# Supplementary material
Source: HighWire-hosted journal article supplement (https://www.eneuro.org/content/6/3/ENEURO.0419-18.2019)

Extended Data Figure 1-1

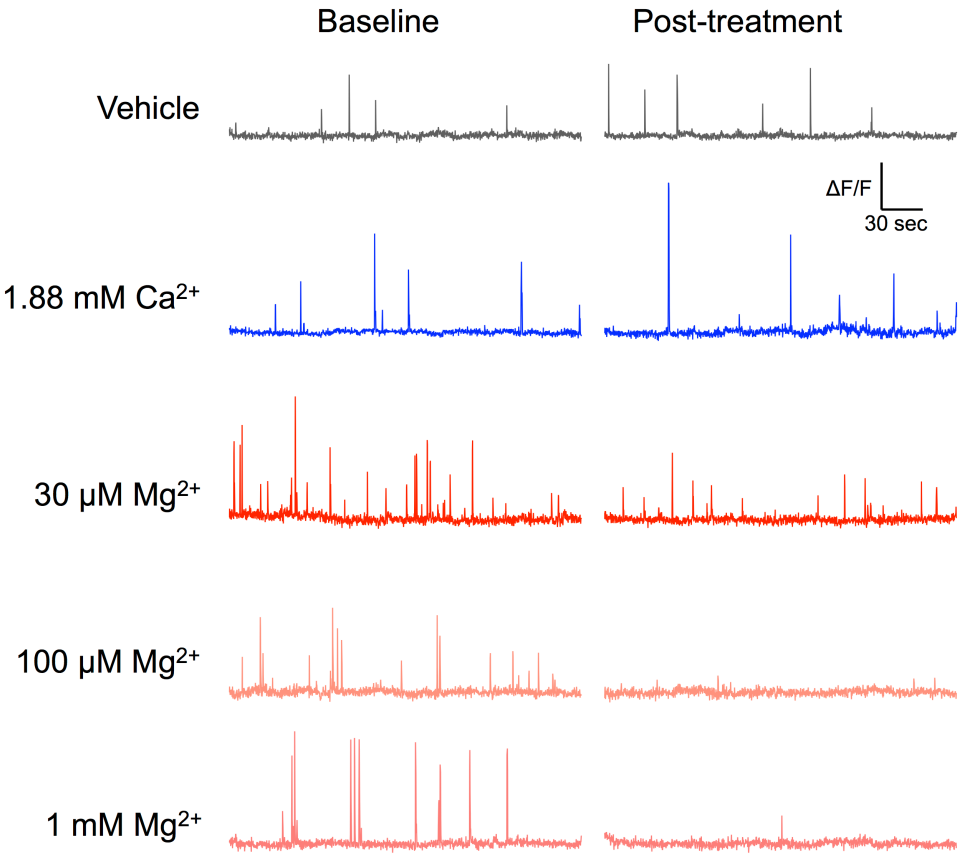

Supplement: inline-supplementary-material-1 [file inline-supplementary-material-1.pdf]
